# Supplementary material
Source: PubMed Central journal article supplement (PMC8882751)
Supplement: 42770_2021_636_MOESM1_ESM.pdf [file 42770_2021_636_MOESM1_ESM.pdf]

Canine distemper virus and canine adenovirus-type 2 infections  
in Neotropical otters (*Lontra longicaudis*) from Southern Brazil

Mariana de Mello Zanim Michelazzo <sup>¥</sup>; Tayná Messias Martinelli <sup>¥</sup>;

Vânia Regina Gonçalves de Amorim <sup>‡</sup>, Luara Evangelista Silva <sup>¥</sup>, Flávia Helena Pereira  
Silva <sup>‡</sup>; Ana Aparecida Correa Xavier <sup>¥</sup>

Zalmir Silvino Cubas <sup>\*</sup>; Rafaelli Ferreira de Almeida <sup>‡</sup>; Wanderlei de Moraes <sup>\*</sup>;

Selwyn Arlington Headley <sup>¥, ‡, †</sup>

<sup>¥</sup>Laboratory of Animal Pathology, Department of Veterinary Preventive Medicine,  
Universidade Estadual de Londrina, Londrina, Paraná, Brazil

<sup>‡</sup>Programa de Pós-Graduação em Biociência Animal, Universidade de Cuiabá, Cuiabá, Mato  
Grosso, Brazil

<sup>\*</sup>Bela Vista Sanctuary, Itaipu Binacional, Foz do Iguaçu, Paraná, Brazil

<sup>‡</sup>Programa de Pós-Graduação em Saúde e Produção Animal, Universidade Norte do Paraná,  
Arapongas, Paraná, Brazil

**Corresponding author**

Dr Selwyn A. Headley, Laboratory of Animal Pathology, Department of Veterinary Preventive  
Medicine, Universidade Estadual de Londrina, Paraná, Rodovia Celso Garcia Cid, PR 445 Km  
380, Campus Universitário, PO Box 10.011, 86057-970. Brazil. Phone/Fax: + 55 43 3371-  
4766. E-mail: [selwyn.headley@uel.br](mailto:selwyn.headley@uel.br)

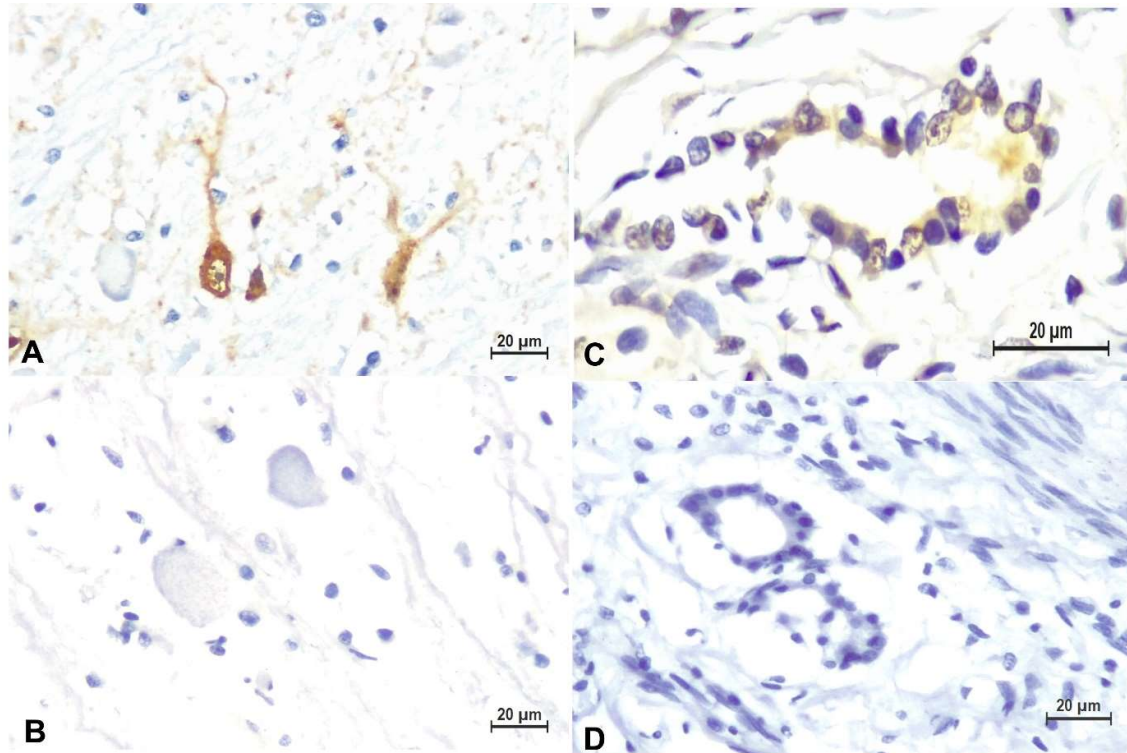

Supplemental Figure 1. Positive and negative controls used in immunohistochemical assays. Observe positive intracytoplasmic immunoreactivity for antigens of canine distemper virus within neurons of the brainstem of a dog (A) and negative immunoreactivity for CDV (B). There is positive intracytoplasmic immunoreactivity for antigens of canine adenovirus two within peribronchial glands (C) of the lungs of a dog and negative immunoreactivity for CAdV-2 within peribronchial glands. Immunoperoxidase counterstained with hematoxylin. Bars, A-D, 20µm.
